# Supplementary material for: Protein hydrolysate derived from Stichopus horrens with antibacterial activity: preparation, characterization, and antibacterial mechanism
Source: Royal Society of Chemistry journal article supplement (doi:10.1039/d6ra03185d), 2026-04-29
Supplement: d6ra03185d1.pdf [file d6ra03185d1.pdf]

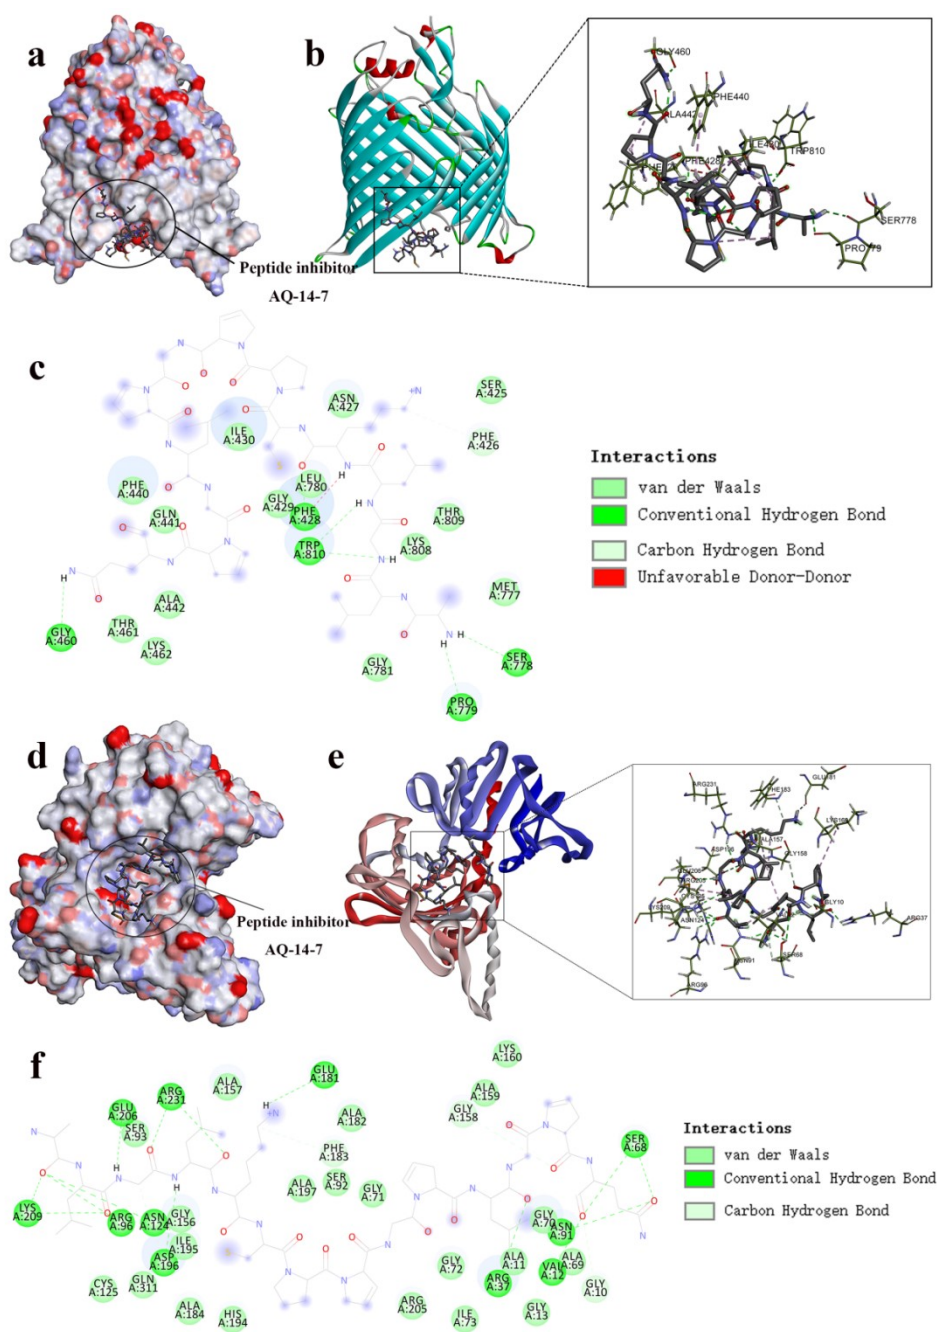

**Figure S2.** Molecular docking diagram of antibacterial peptide AQ-14-7 binding to BamA and asd proteins. (a) Top view of antibacterial peptide AQ-14-7 binding to BamA protein; (b) The binding mode of antibacterial peptide AQ-14-7 with BamA protein; (c) 2D interaction of antimicrobial peptide AQ-14-7 with BamA protein; (d) Top view of antibacterial peptide AQ-14-7 binding to asd protein; (e) The binding mode of antibacterial peptide AQ-14-7 with asd protein; (f) 2D interaction of antimicrobial peptide AQ-14-7 with asd protein.
